# Supplementary material for: Network analysis of an in vitro model of androgen-resistance in prostate cancer
Source: Springer Nature journal article supplement (doi:10.1186/s12885-015-1884-7), 2015-11-10
Supplement: MOESM1 [file 9745552]

| <b>Top 15 Pathways Human<br/>(No of genes mapped out of 3959)</b>                |
|----------------------------------------------------------------------------------|
| hsa01100 Metabolic pathways - Homo sapiens (human) (399)                         |
| hsa05200 Pathways in cancer - Homo sapiens (human) (119)                         |
| hsa04151 PI3K-Akt signaling pathway - Homo sapiens (human) (92)                  |
| hsa04141 Protein processing in endoplasmic reticulum - Homo sapiens (human) (73) |
| hsa05205 Proteoglycans in cancer - Homo sapiens (human) (67)                     |
| hsa04014 Ras signaling pathway - Homo sapiens (human) (67)                       |
| hsa04510 Focal adhesion - Homo sapiens (human) (65)                              |
| hsa04144 Endocytosis - Homo sapiens (human) (64)                                 |
| hsa04015 Rap1 signaling pathway - Homo sapiens (human) (62)                      |
| hsa05166 HTLV-I infection - Homo sapiens (human) (62)                            |
| hsa04024 cAMP signaling pathway - Homo sapiens (human) (61)                      |
| hsa04810 Regulation of actin cytoskeleton - Homo sapiens (human) (59)            |
| hsa04080 Neuroactive ligand-receptor interaction - Homo sapiens (human) (59)     |
| hsa04010 MAPK signaling pathway - Homo sapiens (human) (58)                      |
| hsa04020 Calcium signaling pathway - Homo sapiens (human) (55)                   |

**Table 1 - Top 15 Pathways for the Human differentially expressed genes**

| <b>Top 15 Pathways Cell Line<br/>(No of genes mapped out of 2611)</b>          |
|--------------------------------------------------------------------------------|
| hsa01100 Metabolic pathways - Homo sapiens (human) (196)                       |
| hsa05200 Pathways in cancer - Homo sapiens (human) (88)                        |
| hsa03010 Ribosome - Homo sapiens (human) (77)                                  |
| hsa04151 PI3K-Akt signaling pathway - Homo sapiens (human) (65)                |
| hsa05016 Huntington's disease - Homo sapiens (human) (56)                      |
| hsa05166 HTLV-I infection - Homo sapiens (human) (49)                          |
| hsa04810 Regulation of actin cytoskeleton - Homo sapiens (human) (48)          |
| hsa04510 Focal adhesion - Homo sapiens (human) (47)                            |
| hsa04014 Ras signaling pathway - Homo sapiens (human) (46)                     |
| hsa05010 Alzheimer's disease - Homo sapiens (human) (45)                       |
| hsa04015 Rap1 signaling pathway - Homo sapiens (human) (44)                    |
| hsa04932 Non-alcoholic fatty liver disease (NAFLD) - Homo sapiens (human) (42) |
| hsa04010 MAPK signaling pathway - Homo sapiens (human) (42)                    |
| hsa00190 Oxidative phosphorylation - Homo sapiens (human) (40)                 |
| hsa05012 Parkinson's disease - Homo sapiens (human) (40)                       |

**Table 2 - Top 15 Pathways for the Cell line differentially expressed genes**

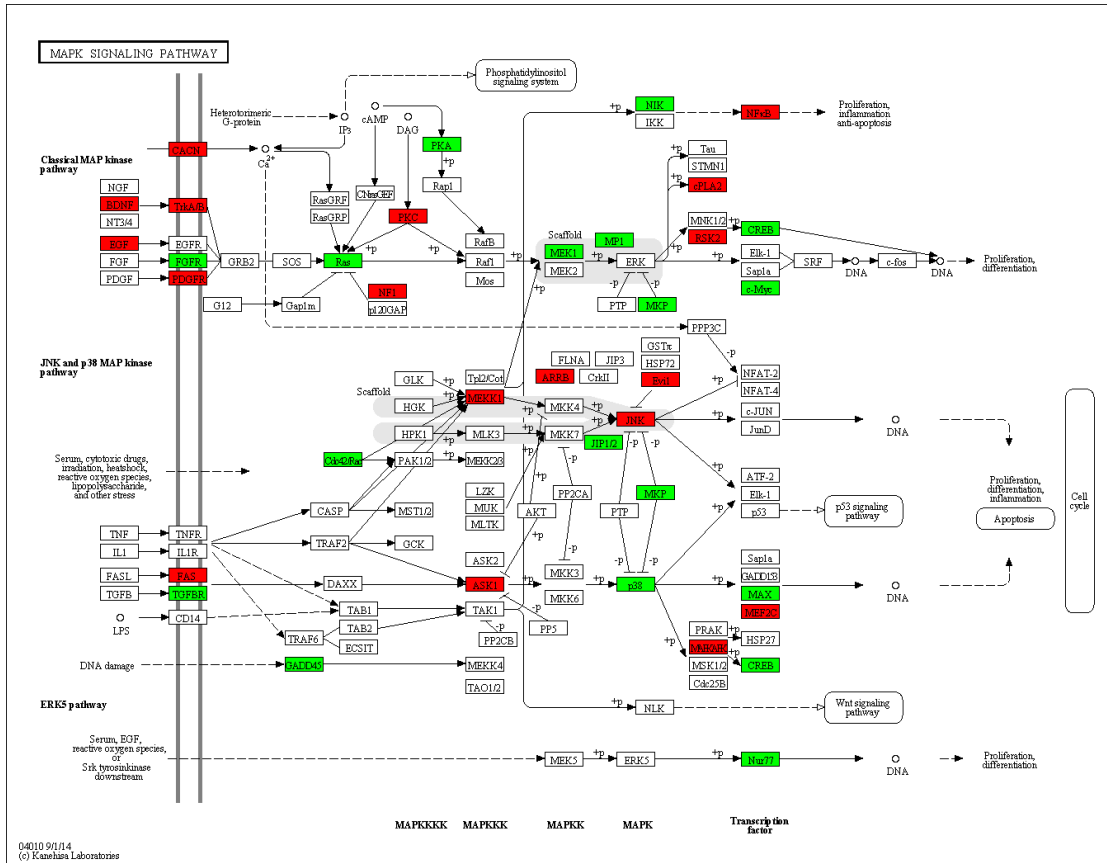

Figure 1 - Differentially expressed cell line genes overlaid on KEGG hsa04010 MAPK signaling pathway

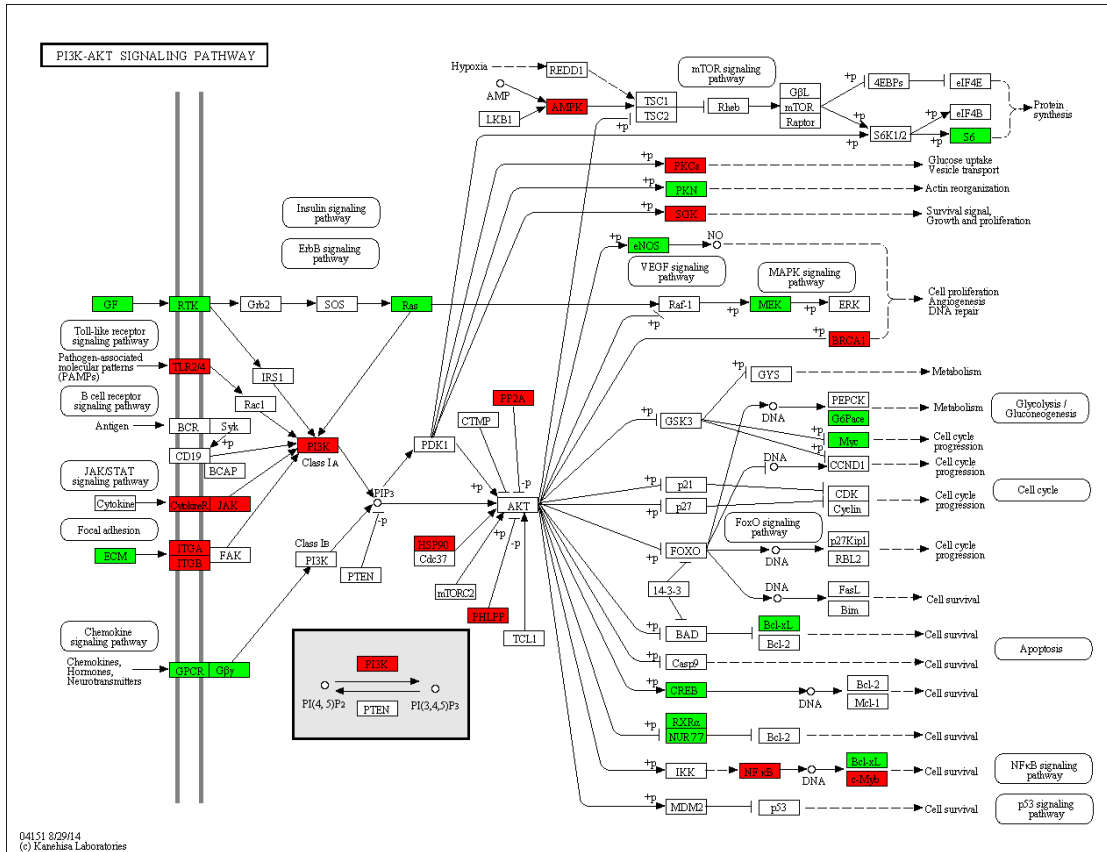

Figure 2 - Differentially expressed cell line genes overlaid on KEGG hsa04151 PI3K-Akt signaling pathway - Homo sapiens (human)

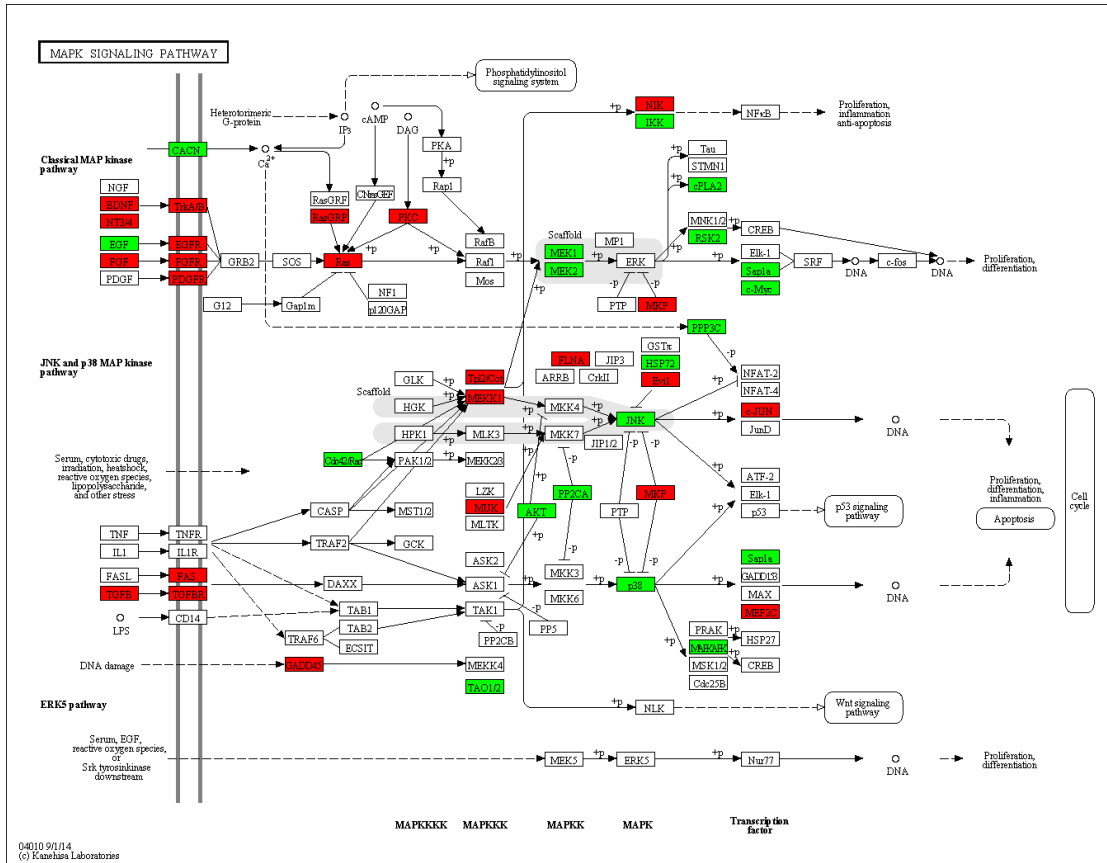

**Figure 3 – Differentially expressed human tumour genes overlaid on KEGG hsa04010 MAPK signaling pathway**

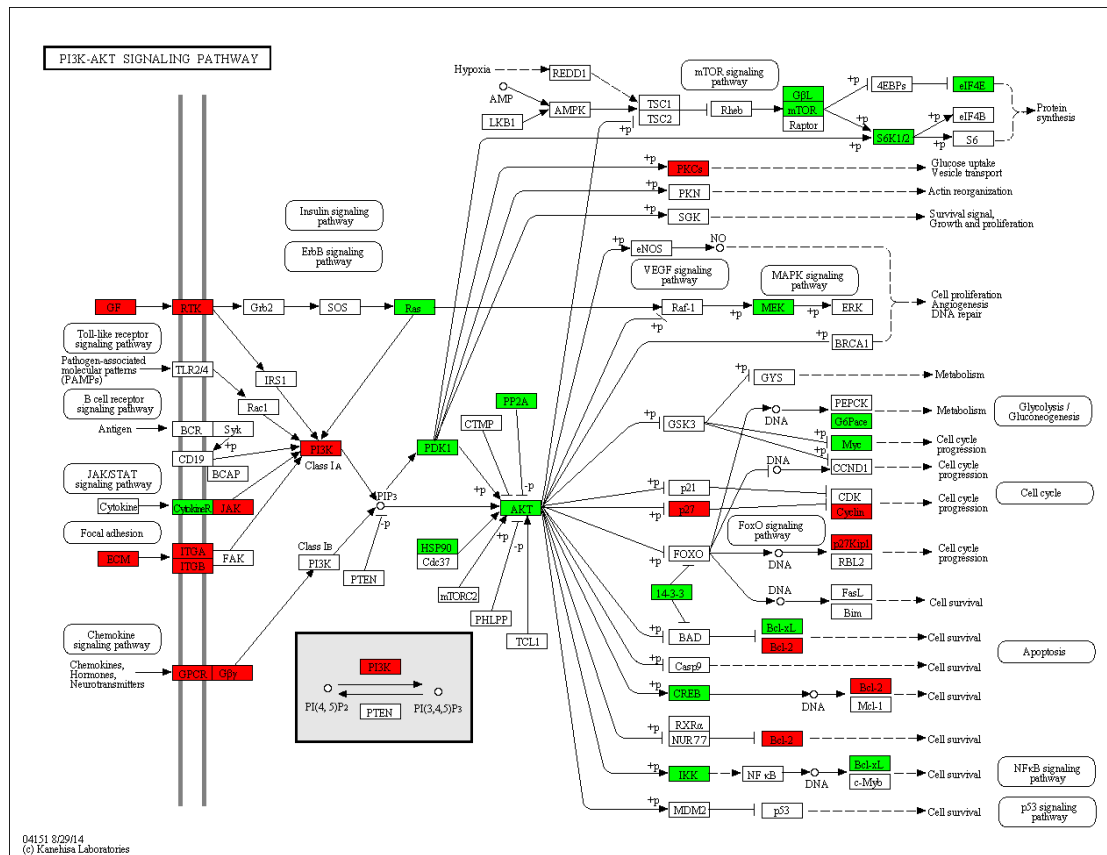

**Figure 4 - Differentially expressed human tumour genes overlaid on KEGG hsa04151 PI3K-Akt signaling pathway - Homo sapiens (human)**
